# Developmental Changes of Prefrontal Activation in Humans: A Near-Infrared Spectroscopy Study of Preschool Children and Adults

Yuki Kawakubo<sup>1\*</sup>, Toshiaki Kono<sup>1</sup>, Ryu Takizawa<sup>2</sup>, Hitoshi Kuwabara<sup>1</sup>, Ayaka Ishii-Takahashi<sup>2</sup>, Kiyoto Kasai<sup>2</sup>

**1** Department of Child Neuropsychiatry, Graduate School of Medicine, University of Tokyo, Tokyo, Japan, **2** Department of Neuropsychiatry, Graduate School of Medicine, University of Tokyo, Tokyo, Japan

## Abstract

Previous morphological studies indicated that development of the human prefrontal cortex (PFC) appears to continue into late adolescence. Although functional brain imaging studies have sought to determine the time course of functional development of the PFC, it is unclear whether the developmental change occurs after adolescence to adulthood and when it achieves a peak because of the narrow or discontinuous range in the participant's age. Moreover, previous functional studies have not focused on the anterior frontal region, that is, the frontopolar regions (BA9/10). Thus, the present study investigated the developmental change in frontopolar PFC activation associated with letter fluency task by using near-infrared spectroscopy (NIRS), in subjects from preschool children to adults. We analyzed the relative concentration of hemoglobin ( $\Delta$ Hb) in the prefrontal cortex measured during the activation task in 48 typically-developing children and adolescents and 22 healthy adults. Consistent with prior morphological studies, we found developmental change with age in the children/adolescents. Moreover, the average  $\Delta$ oxy-Hb in adult males was significantly larger than that in child/adolescent males, but was not true for females. These data suggested that functional development of the PFC continues into late adolescence. Although the developmental change of the frontopolar PFC was independent of gender from childhood to adolescence, in adulthood a gender difference was shown.

**Citation:** Kawakubo Y, Kono T, Takizawa R, Kuwabara H, Ishii-Takahashi A, et al. (2011) Developmental Changes of Prefrontal Activation in Humans: A Near-Infrared Spectroscopy Study of Preschool Children and Adults. *PLoS ONE* 6(10): e25944. doi:10.1371/journal.pone.0025944

**Editor:** Kenji Hashimoto, Chiba University Center for Forensic Mental Health, Japan

**Received:** May 31, 2011; **Accepted:** September 14, 2011; **Published:** October 12, 2011

**Copyright:** © 2011 Kawakubo et al. This is an open-access article distributed under the terms of the Creative Commons Attribution License, which permits unrestricted use, distribution, and reproduction in any medium, provided the original author and source are credited.

**Funding:** This study was supported by Health and Labour Sciences Research Grants for Comprehensive Research on Disability, Health and Welfare (H23-Seishin-Ippan-002 to YK and RT), and Grant-in-Aid for Scientific Research on Innovative Areas (Adolescent Mind & Self-Regulation: 23118001, & 23118004 to KK), MEXT, Japan. A part of this study was also the result of "Development of biomarker candidates for social behavior" carried out under the Strategic Research Program for Brain Sciences by the MEXT. The funders had no role in study design, data collection and analysis, decision to publish, or preparation of the manuscript.

**Competing Interests:** The authors have declared that no competing interests exist.

\* E-mail: yukik-ty@umin.ac.jp

## Introduction

The pattern of development and maturation of the human prefrontal cortex (PFC) from childhood through early adulthood is an important research question in neuroscience. The activity of the catechol-o-methyltransferase (COMT) enzyme that modulates dopamine levels in the PFC increases from the neonate through to adulthood [1], consistent with the critical role of dopamine in modulating normal PFC function [2]. Previous morphological studies have used postmortem brains and MRI to indicate that development appears to continue into late adolescence in terms of synaptic density [3], gray matter volume [4,5] and cortical thickness [6].

Functional brain imaging studies have also sought to determine the time course of functional development of the PFC, although the findings have been equivocal. A positron emission tomography (PET) study showed that glucose metabolism at 4 years and 9–10 years was at a high plateau and after 9–10 years began to decline and gradually reaches adult values by 16–18 years [7]. Some functional MRI (fMRI) studies showed that the activation of the dorsolateral PFC (DLPFC) increased with age during the declarative memory task for 8–24 year-olds [8], and that the

greater activation in adults than in adolescents during the Stroop task for 7–22 year-olds [9]. Others indicated that DLPFC was more active in children (9–12 year-olds) than in adults (20–30 year-olds) in the go/no-go task [10], and that adolescents (14–17 year-olds) showed greater activation than children (8–13 year-olds) and adults (18–30 year-olds) in the saccade task [11]. The ventrolateral PFC (VLPFC) was activated in adults only during the go/no-go task, but not in children (8–12 year-olds) [12], while children (8–13 year-olds) demonstrated greater activation than adults (19–48 year-olds) in the verbal fluency task [13]. In a near-infrared spectroscopy (NIRS) study, both adults and preschool children (5–6 year-olds) increased oxyhemoglobin (oxyHb) in the lateral PFC (LPFC) during the working memory task and the activation of LPFC was larger and broader in children than in adults, although children were not directly compared with adults [14]. Another study using the Stroop task, however, showed that the oxyHb responses in the young adults were greater and faster than those in children (7–13 year-olds), and reported that the DLPFC activation increased with age [15]. To summarize the above findings, previous studies have been mixed regarding in which life stage (childhood, adolescence, adulthood) the LPFC activation becomes largest.

The disagreement in functional brain imaging studies might be attributed to participant's age, task demands or the experimental paradigm, such as event-related design or blocked design. Since few studies included participants with a broad range in age from childhood to adulthood, it is unclear whether the developmental change occurs between adolescence and adulthood and when it achieves its peak. Moreover, although previous studies have investigated the anterior frontal region, that is, the frontopolar regions (BA9/10), they have not focused on it. The frontopolar regions have a higher-order integrative prefrontal function [16] and comparative studies of humans and apes [17] suggested that they have enlarged and become specialized during hominid evolution. The frontopolar regions might coordinate VLPFC and DLPFC functions in order to achieve task goals or maximize task performance [18–20], and might evaluate internally generated information [21]. Because the frontopolar cortex is located in the vicinity of air-filled spaces of the nasal cavity, the corresponding magnetic susceptibility differences at air–tissue or bone–tissue interfaces result in severe distortions and regional signal losses in long-TE gradient-echo images, particularly for ultrafast imaging techniques such as echo-planar imaging in a high magnetic field. Therefore, such observation without signal losses in the frontopolar PFC might be one of the reasons for the superiority of NIRS.

NIRS is one of the most promising noninvasive functional neuroimaging tools to allow comparative evaluation of cortical hemodynamic response for children and individuals with psychiatric disorders. NIRS can measure the signals reflecting relative concentrations change of oxy-hemoglobin ( $\Delta\text{oxy-Hb}$ ) and deoxy-hemoglobin ( $\Delta\text{deoxy-Hb}$ ), which are assumed to reflect regional cerebral blood volume (rCBV). While fMRI and PET have an excellent spatial resolution, they are limited in that they require a large apparatus that prevents their use in bedside settings for diagnostic and treatment purposes. In contrast, NIRS is a neuroimaging modality that, for the following reasons is especially suitable for assessing the PFC of infants [22], children [14,15] and psychiatric disorders [23–28] because NIRS is relatively insensitive to motion artifacts, it can be applied to experiments that might cause some motion of the subjects, such as vocalization. Second, the subject can be examined in a natural sitting position, without any surrounding distraction. Third, the cost is much lower than other neuroimaging modalities and the set-up is very easy. Fourth, as the test-retest reliability at weekly and monthly intervals has demonstrated [29,30], NIRS can be applied to longitudinal assessment following intervention. Fifth, the high temporal resolution of NIRS is useful in characterizing the time course of prefrontal activity [23–25].

By simultaneous measurements with other methodologies, it has been shown that the  $\Delta\text{oxy-Hb}$  measured by NIRS correlates with the rCBF change in  $^{15}\text{H}_2\text{O}$  PET [31] and the blood oxygenation level-dependent [32] signal in fMRI [33]. In other fMRI studies [32,34,35], in which the  $\Delta\text{oxy-Hb}$  was not analyzed, the  $\Delta\text{deoxy-Hb}$  in NIRS has been correlated with the BOLD signal.

Moreover, previous studies showed that the verbal fluency test is a valid cognitive activation task to evaluate  $\Delta\text{Hb}$  in PFC using NIRS [24–26,28,31]. In NIRS studies recording the  $\Delta\text{Hb}$  during several tasks for the same subject group, the smaller-than-normal  $\Delta\text{oxy-Hb}$  during the cognitive tasks involving primarily the PFC, such as the letter fluency test and the random number generation task, was task specific in schizophrenia, i.e., this was not evident during other tasks, such as the sequential finger-to-thumb task [36], or the finger tapping task [24]. These findings suggested that the  $\Delta\text{oxy-Hb}$  reflected the neural activation but not general or nonspecific factors, such as impaired vascular responsiveness irrespective of neural activation or optical pathlength.

Thus, the present study investigated the developmental change in frontopolar PFC activation associated with the letter fluency task by using NIRS, in a group of subjects that included preschool children to adults.

## Methods

### 1) Subjects

Subjects were 48 typically-developing children and adolescents (22 male and 26 female; age range, 5–18 years; mean age, 10.9; mean IQ, 106.2) and 22 healthy adults (11 male and 11 female; age range, 21–37 years; mean age, 27.3; mean IQ, 113.1) (Table 1). Participants were mainly recruited from college students, hospital staff, their acquaintances and children, and those who volunteered for participating through the laboratory's web site. When siblings or twin pairs participated in this study, only one was randomly selected and included in the data analysis (five children were from siblings and 23 children from twin pairs). As shown in the results section, the twin subjects and non-twin subjects did not significantly differ in  $\Delta\text{Hb}$ . The exclusion criteria were neurological illness, traumatic brain injury with any known cognitive consequences or loss of consciousness for more than 5 minutes, a history of electroconvulsive therapy, and alcohol/substance abuse or addiction. An additional exclusion criterion was a history of psychiatric disease or a family history of axis I disorder in their first-degree relatives. IQs were evaluated with the WISC-III or WAIS-R. All participants were right-handed as based on the Edinburgh Inventory [37] and were native Japanese speakers.

### 2) Ethics

The ethical committee of the Faculty of Medicine, University of Tokyo approved this study (No. 630-5). All adult participants gave written informed consent. All child participants gave informed assent and their parents gave written informed consent.

### 3) Activation task

The activation task consisted of a 30 sec rest, a 30 sec letter fluency task and a 30 sec rest. In the letter fluency task, participants were asked to say as many words that began with a Japanese character /a/ as they could. The participants sat on a chair with their eyes open and held their hands on their lap throughout the measurement. The auditory cues were presented at the start and end of the letter fluency task or rest. Hemoglobin concentration changes were measured during the activation task. The activation task was similar to that in previous studies [24,26], but 3 changes were introduced to make the task suitable for children: 1) In the pre- and post-task participants were silent

**Table 1.** Mean of age and IQ in each group.

|                 | Child/<br>adolescent |            | Adult       |             |
|-----------------|----------------------|------------|-------------|-------------|
|                 | Male                 | Female     | Male        | Female      |
| n               | 22                   | 26         | 11          | 11          |
| age             | 9.9±2.7              | 11.7±3.8   | 26.5±5.7    | 28.2±5.5    |
| (range)         | (5.8~17.1)           | (5.5~18.6) | (21.4~37.4) | (21.8~36.4) |
| IQ <sup>a</sup> | 108.5±13.5           | 104.2±11.0 | 115.9±11.4  | 110.4±10.1  |
| (range)         | (81~137)             | (82~123)   | (94~128)    | (92~125)    |

<sup>a</sup>For participants aged 15 and under IQ was evaluated with the WISC-III, for participants aged 16 and over it was estimated by four subtests of the WAIS-R. doi:10.1371/journal.pone.0025944.t001

instead of repeating moras; 2) The time period of the letter fluency task and post-task was shortened to 30 sec from 60 sec; 3) Only a single mora was used in the letter fluency task. The number of words generated during the letter fluency task was determined as a measure of task performance.

#### 4) NIRS measurement

$\Delta$ oxy-Hb and  $\Delta$ deoxy-Hb was measured using a 2-channel NIRS machine (NIRO200, Hamamatsu Photonics, Inc) at three wavelengths of near-infrared light (775, 810, 850 nm). The measurement principles were based on the modified Beer-Lambert law, which calculates  $\Delta$ oxy-Hb and  $\Delta$ deoxy-Hb from the light attenuation change at a given measured point.  $\Delta$ oxy-Hb and  $\Delta$ deoxy-Hb values include a differential pathlength factor and are given in units of mMmm. Each of the two probes consisted of an emitter and a detector separated by 4 cm. The two NIRS probes were placed on the subject's prefrontal regions and secured using double-sided adhesive tape such that the detectors were positioned at Fp1 and Fp2 with the emitters positioned 4 cm on the lateral side of the detectors along the T3–T4 line, according to the international 10/20 system. The machine measured  $\Delta$ Hb approximately 2–3 cm beneath the scalp, i.e., the cortical surface area [31,34]. NIRS probes measured oxygenation at the Brodmann's area 10 (figure 1).

The correspondence of the probe positions and the measurement areas on the cerebral cortex was confirmed by superimposing the measurement positions on a magnetic resonance image of a three-dimensionally reconstructed cerebral cortex for a healthy adult. The locations of NIRO probe were probabilistically estimated and anatomically labeled in the standard brain space (Brodmann's Area) according to [38]. Also, the correspondence was supported by a multisubject study of anatomical cranio-cerebral correction via the international 10–20 system [39]. The sampling time for the recording was 0.5 sec. Baseline correction was made by using the average  $\Delta$ Hb value during the first 30 sec rest, and then the average  $\Delta$ Hb value during the 30 sec task period was calculated in each hemisphere.

#### 5) Statistical Analysis

A 2-way ANOVA with age (child/adolescent, adult) and gender (male, female) as the between-subjects factors used to analyze task performance.

For the mean  $\Delta$ Hb during the 30 sec task period, a 3-way ANCOVA was performed with age (child/adolescent, adult) and gender (male, female) as the between-subjects factors, hemisphere (left, right) as the within-subjects factor and task performance as a covariate. When the sphericity assumption was violated, Green-

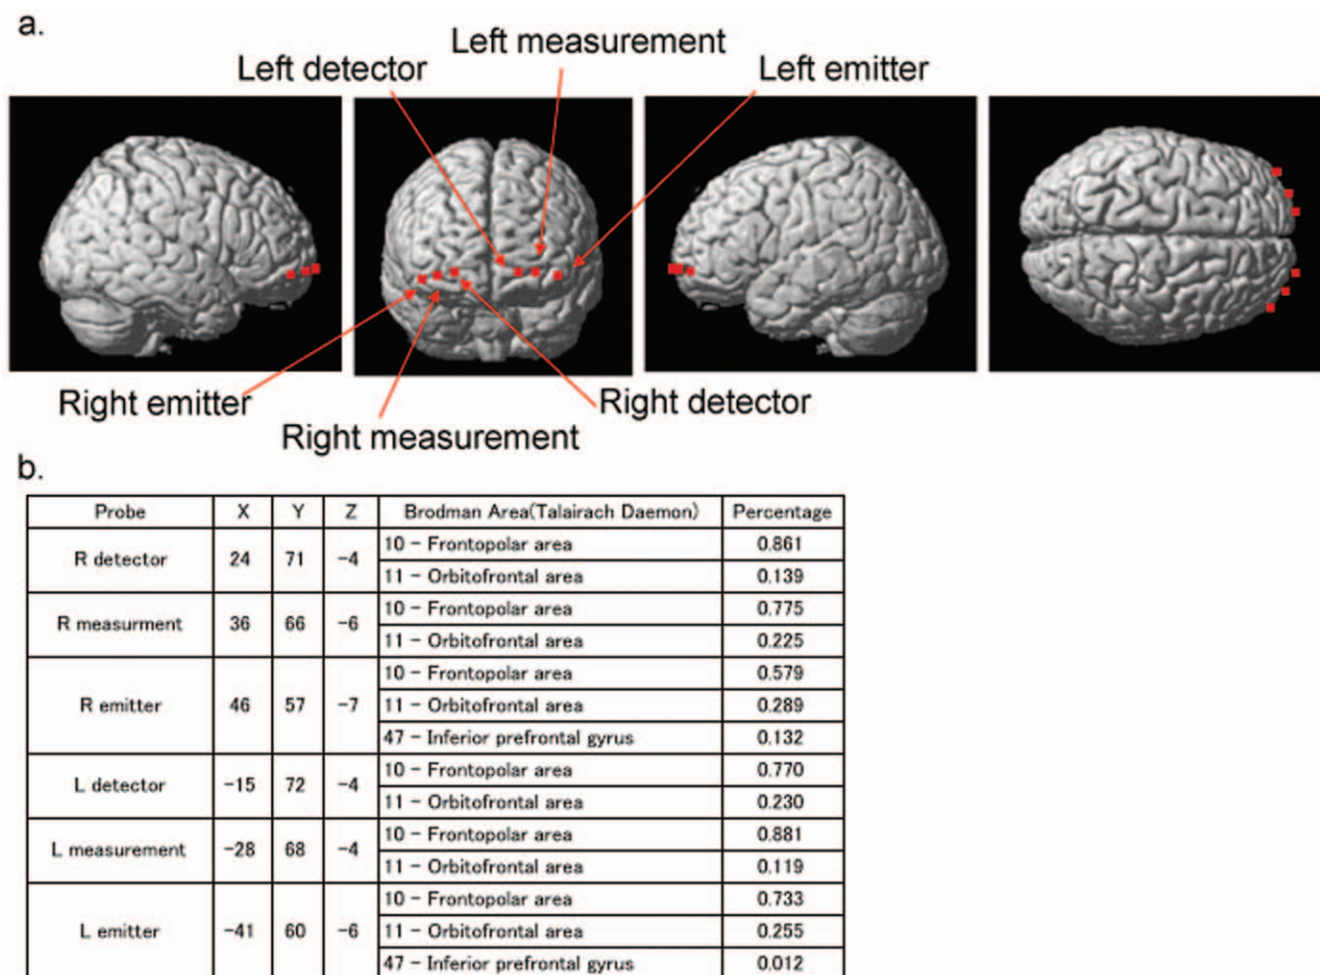

**Figure 1. The probe positions and the measurement areas.** a: The correspondence of the probe positions and the measurement areas on the cerebral cortex. b: The locations of NIRO probe were probabilistically estimated and anatomically labeled in the standard brain space (Brodmann's Area) according to [39].

doi:10.1371/journal.pone.0025944.g001

house-Geisser correction was applied and the associated epsilon was reported. For post-hoc analysis, the mean  $\Delta\text{Hb}$  of the hemispheres was used as the dependent variable with task performance as a covariate and statistically significant level was defined as  $p < .025$  (Bonferroni correction).

We calculated the Pearson's correlation between the average  $\Delta\text{Hb}$  and task performance and age separately for each gender in the child/adolescent and adult groups. Second, the comparison of correlation coefficients between male and female was performed.

## Results

### 1) Task performance

The mean number of words generated during the letter fluency task was: 4.32 (SD = 2.61) for male; 4.38 (SD = 2.23) for female in the child/adolescent group, and 9.27 (SD = 2.90) for male; 8.55 (SD = 1.51) for female in the adult group. A main effect of age was significant ( $F(1,66) = 55.20$ ,  $p < .001$ ), but the effect of gender and the interaction were not significant (gender:  $F(1,66) = .29$ ,  $p = .59$ ; interaction gender and age:  $F(1,66) = .42$ ,  $p = .52$ ).

### 2) Group comparisons of the $\Delta\text{Hb}$

Twenty-three of the participants in the child/adolescent group were one of a pair of twins. T-test showed that the mean  $\Delta\text{Hb}$  was not significantly different between non-twin and twin subject in the child/adolescent group (oxy-Hb:  $t(46) = .48$ ,  $p = .63$ ; deoxy-Hb:  $t(46) = -.90$ ,  $p = .37$ ), indicating that including one of twins may not have significantly influenced the conclusions of the study.

Figure 2 shows grand average waveforms of hemoglobin concentration changes for each group. The average  $\Delta\text{oxy-Hb}$  in the right hemisphere was: mean 0.15 (SD = 0.36) for male; 0.30 (SD = 0.30) for female in the child/adolescent group and 0.65 (SD = 0.45) for male; 0.13 (SD = 0.20) for female in the adult group, and that in the left hemisphere was: mean 0.12 (SD = 0.44) for male; 0.26 (SD = 0.29) for female in the child/adolescent group and 0.57 (SD = 0.49) for male; 0.17 (SD = 0.11) for female in the adult group. For the  $\Delta\text{oxy-Hb}$ , there was a significant interaction between age and gender ( $F(1,65) = 12.27$ ,  $p < .001$ ). All main effects and other interactions were not significant (age:  $F(1, 65) = 3.69$ ,  $p = .059$ ; gender:  $F(1,65) = 3.54$ ,  $p = .07$ ; hemisphere:  $F(1,65) = 1.13$ ,  $p = .29$ ; interactions of age and hemisphere:  $F(1,65) = 1.64$ ,  $p = .21$ , gender and hemisphere:  $F(1,65) = 0.97$ ,  $p = .33$ , age, gender and hemisphere:  $F(1,65) = 1.00$ ,  $p = .32$ ).

Since we found a significant interaction between age and gender, we next conducted post-hoc analyses in two ways using the

mean  $\Delta\text{oxy-Hb}$  of the hemispheres as the dependent variable with task performance as a covariate (Figure 3). First, we compared  $\Delta\text{oxy-Hb}$  two age groups separately for each gender. For male, the average  $\Delta\text{oxy-Hb}$  in the adult group was significantly larger than that in the child/adolescent group ( $F(1,30) = 11.55$ ,  $p < .01$ ). For female, however, it did not reach at a significant level ( $F(1,34) = 4.69$ ,  $p = .04$ ). Second, we compared  $\Delta\text{oxy-Hb}$  between two gender groups separately for each age group. For the child/adolescent group, there was not a significant difference ( $F(1,45) = 2.01$ ,  $p = .16$ ), but in the adult group the average  $\Delta\text{oxy-Hb}$  in male was significantly larger than that in female ( $F(1,19) = 16.15$ ,  $p < .01$ ).

The average  $\Delta\text{deoxy-Hb}$  in the right hemisphere was mean  $-.02$  (SD = .08) in the child/adolescent group,  $-.05$  (SD = .13) in the adult group, and in the left hemisphere was mean  $-.03$  (SD = .10) in the child/adolescent group, and  $-.05$  (SD = .11) in the adult group. For the  $\Delta\text{deoxy-Hb}$ , there was a significant main effect of hemisphere ( $F(1,65) = 4.40$ ,  $p = .04$ ). There were no other significant main effects and any interactions (age:  $F(1,65) = .57$ ,  $p = .46$ ; gender:  $F(1,65) = 1.48$ ,  $p = .23$ ; interactions of age and gender ( $F(1,65) = 1.54$ ,  $p = .22$ , age and hemisphere:  $F(1,65) = 2.64$ ,  $p = .11$ , gender and hemisphere:  $F(1,65) = .17$ ,  $p = .69$ , age, gender and hemisphere:  $F(1,65) = 2.69$ ,  $p = .11$ ).

### 3) Correlation analysis

Since hemoglobin concentrations of both hemispheres did not behave differently as indicated by a lack of significant interactions with hemisphere in the main ANCOVA, we used the mean  $\Delta\text{Hb}$  of the hemispheres for the correlational analyses. The child/adolescent group showed a strongly positive correlation between  $\Delta\text{oxy-Hb}$  and age (male:  $r = 0.50$ ,  $p = .017$ ; female:  $r = .67$ ,  $p < .001$ ), whereas the adult group showed a weak negative correlation which did not reach a significant level (male:  $r = -.15$ ,  $p = .65$ ; female:  $r = -.37$ ,  $p = .27$ ) (Figure 4). The difference in correlation coefficients between male and female was not significant in the child/adolescent or adult groups (Fisher's  $r$  to  $z$  transformation; child/adolescent,  $z = -.76$ ,  $p = .45$ ; adult,  $z = .47$ ,  $p = .64$ ). There were no correlations between the  $\Delta\text{oxy-Hb}$  and task performance in the child/adolescent (male:  $r = -.07$ ,  $p = .75$ ; female:  $r = .30$ ,  $p = .14$ ) or adult groups (male:  $r = -.59$ ,  $p = .06$ ; female:  $r = .05$ ,  $p = .90$ ).

The  $\Delta\text{deoxy-Hb}$  were not correlated with age in the child/adolescent group (male:  $r = -.11$ ,  $p = .62$ ; female:  $r = -.04$ ,  $p = .85$ ), or in the adult group (male:  $r = -.28$ ,  $p = .41$ ; female:  $r = -.41$ ,  $p = .21$ ). The difference in correlation coefficients

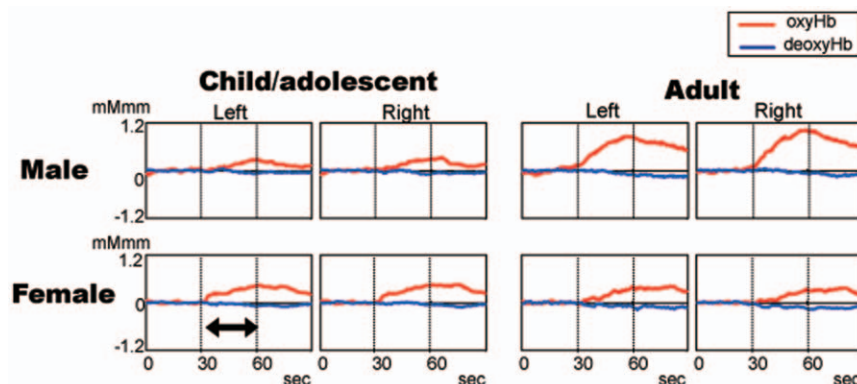

**Figure 2. Grand average waveforms of  $\Delta\text{Hb}$  during the letter fluency task.** Upper: male, lower: female, right: adult group, left: child/adolescent group. Line: red, oxyhemoglobin; blue, deoxyhemoglobin. The period of the activation task is between the two dotted lines. doi:10.1371/journal.pone.0025944.g002

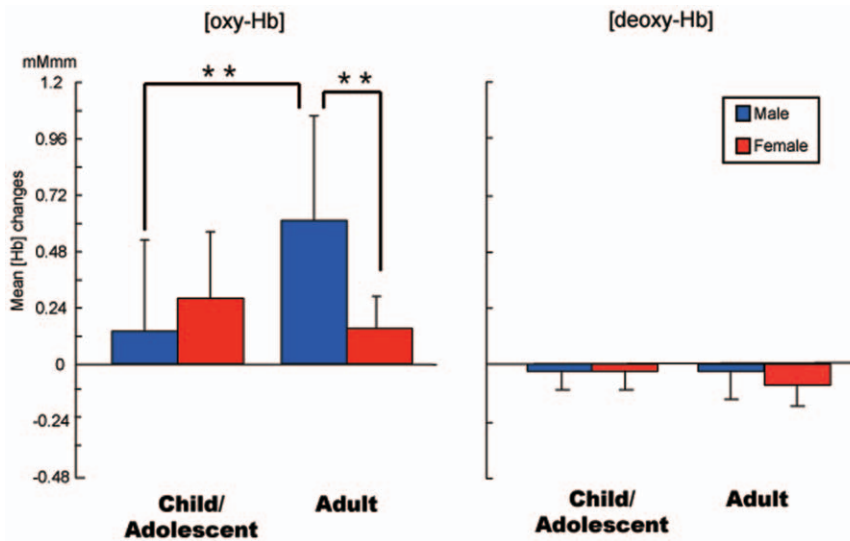

**Figure 3. The mean  $\Delta$ Hb of the hemispheres in each group.** Left:  $\Delta$ oxy-Hb, right:  $\Delta$ deoxy-Hb, blue: male, red: female. The average  $\Delta$ oxy-Hb in the adult group was significantly larger than that in the child/adolescent group for male ( $F(1,30) = 11.55$ ,  $p < .01$ ). Moreover, for the adult group the average  $\Delta$ oxy-Hb in male was significantly larger than that in female ( $F(1,19) = 16.15$ ,  $p < .01$ ). doi:10.1371/journal.pone.0025944.g003

between male and female was not significant in the child/adolescent or adult groups (child/adolescent,  $z = .23$ ,  $p = .82$ ; adult,  $z = .31$ ,  $p = .76$ ). There were no correlations between the  $\Delta$ deoxy-Hb and task performance in the child/adolescent (male:  $r = -.02$ ,  $p = .94$ ; female:  $r = .01$ ,  $p = .95$ ) or adult groups (male:  $r = -.19$ ,  $p = .57$ ; female:  $r = .31$ ,  $p = .35$ ).

## Discussion

To our knowledge, this is the first report of developmental changes in frontopolar PFC hemodynamic data from preschool children to adults. First, in the children/adolescent group the  $\Delta$ oxy-Hb during the verbal fluency task was significantly increased with age. Contrary to the strongly positive correlation between prefrontal activation and age in the child/adolescent group, the correlation coefficient was slightly negative but not statistically significant in the adult group. Second, the effect of gender on  $\Delta$ oxy-Hb differed depending on age, where in the adult group the males showed a larger  $\Delta$ oxy-Hb than the females, but in the child/adolescent group there was no difference between the males and the females.

### 1) Developmental change of the frontopolar PFC

Meta-analysis of fMRI [40] and previous multi-channel NIRS studies [24–26,28] showed that frontopolar areas were not the sites of typical activation during letter fluency task, but that widespread regions of the prefrontal cortical surface area and superior temporal regions were recruited. However, comparative studies of humans and apes showed that the frontopolar regions have enlarged and become specialized during hominid evolution [17]. Previous NIRS studies, furthermore, found that the activation of frontopolar region during the letter fluency test were associated with the social functioning in schizophrenia [28]. Thus, even if the frontopolar region was not mainly recruited during the letter fluency test, the activation of this area has important roles of human life because the frontopolar regions have a higher-order integrative prefrontal function [16]. In this study, frontopolar activation increased with age and boys showed smaller activation than men. Although an fMRI study using the verbal fluency task found that activation of the ventrolateral prefrontal cortex (BA44/45) is larger in children than in adults [13], it is not necessarily contradictory that the time course does not agree with previous

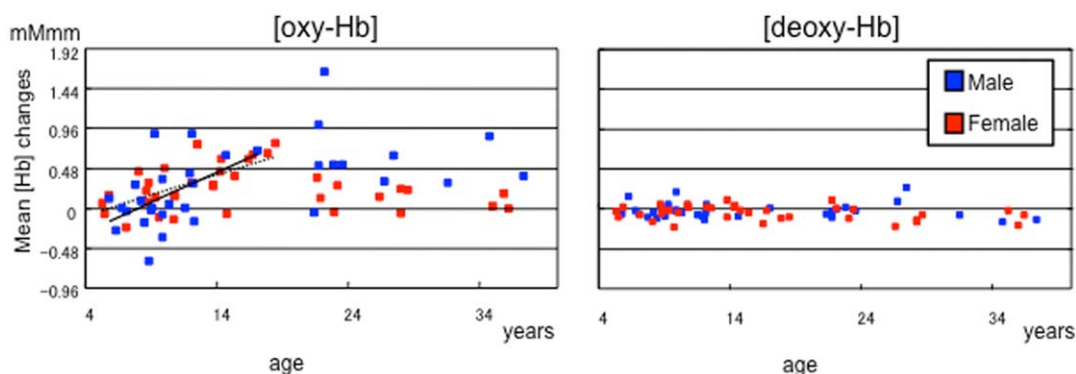

**Figure 4. The scatter plots of age and the mean  $\Delta$ Hb of the hemispheres.** Left:  $\Delta$ oxy-Hb, right:  $\Delta$ deoxy-Hb, blue: male, red: female. Contrary to the strongly positive correlation between  $\Delta$ oxy-Hb and age in the child/adolescent group (male:  $r = 0.50$ ,  $p = .017$ ; female:  $r = .67$ ,  $p < .001$ ), the correlation coefficient was slightly negative but not statistically significant in the adult group. doi:10.1371/journal.pone.0025944.g004

developmental studies on the function at other regions of the prefrontal cortex. Rather, the present NIRS data was consistent in showing that the BA10 is developed latest in the ontogenetic change and might suggest that the cortical area recruited by the verbal fluency task might shift from the dorso-ventrolateral to the anterior polar region with age. However, this interpretation should be validated in future studies using an instrument with a wider coverage of prefrontal and temporal area.

The results of the correlation analysis in the child/adolescent group suggest that recruitment of the frontopolar PFC during letter fluency tasks increases with age in childhood and adolescence, and that development appears to continue into late adolescence. These results are in agreement with a previous morphological study on the frontopolar PFC [41].

Contrary to the strongly positive correlation between prefrontal activation and age in the child/adolescent group, the correlation coefficient was slightly negative but not statistically significant in the adult group. This was consistent with previous NIRS studies using the letter fluency task, in which the  $\Delta$ oxy-Hb in middle age was smaller than that in young adults [42,43]. A failure in reaching statistically significant level in this study may be due to the narrow range of the participant's age and the small sample size in the adult group.

## 2) Gender effect on frontopolar PFC activation

In the adult group, the mean  $\Delta$ oxy-Hb during the letter fluency test was larger in the males than in the females. This finding of gender effect on  $\Delta$ oxy-Hb was in agreement with a previous NIRS study using the same task [25]. Mean IQ and mean age were not likely to be main confounding factors, since they were not different between genders.

The gender effect on  $\Delta$ oxy-Hb differed depending on age, where in the child/adolescent group there were no significant differences in correlation coefficients or mean  $\Delta$ oxy-Hb between genders. This developmental course was compatible with other morphological data that reported no gender difference in the frontopolar thickness in subjects 8–20 years of age [41]. In comparison of  $\Delta$ oxy-Hb between the two age groups separately for each gender, the males showed a larger  $\Delta$ oxy-Hb in the adult group than in the child/adolescent group, but the females showed no difference between the two age groups. Taken together, these results suggested that the developmental change in the frontopolar PFC hemodynamic response until late adolescence occurred independent of gender and that the peak of the  $\Delta$ oxy-Hb was younger and smaller in females than in males. Those findings could be related to a high plateau peak of frontal gray matter at younger and smaller in females than in males [4].

## 3) Methodological issues

First, we used the resting state as the baseline to facilitate applicability of the task for child participants, although we assumed a simple vocalization task for the baseline would be more ideal to derive a pure activation related to the letter fluency task. Therefore, the age-dependent increase in frontopolar PFC activation may reflect an age-dependent increase in brain activity due to vocalization per se or age-dependent hypoperfusion during the baseline period (resting state). PET studies have reported age-dependent decreased oxygen metabolism and regional cerebral blood flow (rCBF) during the resting state in the frontal areas [7,44]. Thus, it may be possible that the adolescents were hypoperfused during the baseline, and then activation during the task would have been larger compared with that for the younger

children. However, this interpretation is incomplete because the age at peak  $\Delta$ oxy-Hb in this study was incongruent with a peak of the rCBF [44] and the glucose metabolic rate [7] in PET studies. Furthermore, it is impossible to distinguish whether these results were due to 'cognitive development' or just to 'phonation development' and 'structural development'. Thus, future studies should add a simple vocalization as the referential condition and investigate the structural development

Second, the design used in this study suffered from difference in optical properties of scalp and cortical tissues with age and gender. Adults are expected to have thicker skulls than children, and males' skulls are thicker than females'. Simulation studies on tissue optical properties [45] indicated that the thicker skull contributes toward decreasing amplitude of oxyHb signal. However, the current study showed that the  $\Delta$ oxy-Hb was largest in the adult male. Thus, although individual difference in optical properties of scalp and cortical tissues is very important in theory, it may not have a substantial effect on the statistical conclusion reported here.

Third, as we measured activation of only the frontopolar regions of the PFC during a letter fluency test in this study, results could not be compared with the activation of other regions and tasks. Thus, a functional control task such as checkerboard rotation or finger tapping tasks and measurement of other regions as reference are needed to compensate individual difference in the tissue optical properties and provide more convincing results in future studies using a multi-channel NIRS machine.

Fourth, we used the cross-sectional design, not the longitudinal one. However, IQ was controlled between the child/adolescent and adult groups for each gender (male:  $t(31) = -1.56$ ,  $p = .13$ ; female:  $t(35) = -1.58$ ,  $p = .12$ ). Future research with a longitudinal design is necessary for a more comprehensive understanding of developmental change in the PFC.

Fifth, a recent NIRS study showed the influence of skin blood flow on NIRS signals measured on the forehead during a verbal fluency task [46]. This study criticized that frontopolar activation may not represent cortical change but non-cortical physiological signal, which is autonomic control. Thus, it remains possible that our data may at least partially represent the development of autonomic control. Future studies are needed to disentangle contribution of cerebral and skin blood flow on the NIRS signals in various NIRS apparatuses by using, for example, simultaneous measurement of NIRS and fMRI during cognitive activation.

## 4) Conclusion

The present study, which investigated frontopolar PFC activation during the verbal fluency test, suggested that functional development of the area continues to late adolescence. Although the developmental change of the frontopolar PFC was independent of gender from childhood to adolescence, in adulthood a gender difference was shown.

## Acknowledgments

We thank all the participants and their families. Also, we thank Mr. Shingo Kawasaki for technical supports of superimposing the measurement positions on a magnetic resonance image.

## Author Contributions

Conceived and designed the experiments: YK HK KK. Performed the experiments: YK TK RT HK AI-T. Analyzed the data: YK RT KK. Wrote the paper: YK KK.

## References

- Tunbridge EM, Weickert CS, Kleinman JE, Herman MM, Chen J, et al. (2007) Catechol-o-methyltransferase enzyme activity and protein expression in human prefrontal cortex across the postnatal lifespan. *Cereb Cortex* 17: 1206–1212.
- Goldman-Rakic PS, Muly EC, 3rd, Williams GV (2000) D(1) receptors in prefrontal cells and circuits. *Brain Res Brain Res Rev* 31: 295–301.
- Huttenlocher PR (1979) Synaptic density in human frontal cortex - developmental changes and effects of aging. *Brain Res* 163: 195–205.
- Giedd JN, Blumenthal J, Jeffries NO, Castellanos FX, Liu H, et al. (1999) Brain development during childhood and adolescence: a longitudinal MRI study. *Nat Neurosci* 2: 861–863.
- Gogtay N, Giedd JN, Lusk L, Hayashi KM, Greenstein D, et al. (2004) Dynamic mapping of human cortical development during childhood through early adulthood. *Proc Natl Acad Sci U S A* 101: 8174–8179.
- Sowell ER, Thompson PM, Leonard CM, Welcome SE, Kan E, et al. (2004) Longitudinal mapping of cortical thickness and brain growth in normal children. *J Neurosci* 24: 8223–8231.
- Chugani HT (1998) A critical period of brain development: studies of cerebral glucose utilization with PET. *Prev Med* 27: 184–188.
- Ofen N, Kao YC, Sokol-Hessner P, Kim H, Whitfield-Gabrieli S, et al. (2007) Development of the declarative memory system in the human brain. *Nat Neurosci* 10: 1198–1205.
- Adelman NE, Menon V, Blasey CM, White CD, Warsofsky IS, et al. (2002) A developmental fMRI study of the Stroop color-word task. *Neuroimage* 16: 61–75.
- Booth JR, Burman DD, Meyer JR, Lei Z, Trommer BL, et al. (2003) Neural development of selective attention and response inhibition. *Neuroimage* 20: 737–751.
- Luna B, Thulborn KR, Munoz DP, Merriam EP, Garver KE, et al. (2001) Maturation of widely distributed brain function subserves cognitive development. *Neuroimage* 13: 786–793.
- Bunge SA, Dudukovic NM, Thomason ME, Vaidya CJ, Gabrieli JD (2002) Immature frontal lobe contributions to cognitive control in children: evidence from fMRI. *Neuron* 33: 301–311.
- Gaillard WD, Hertz-Pannier L, Mott SH, Barnett AS, LeBihan D, et al. (2000) Functional anatomy of cognitive development: fMRI of verbal fluency in children and adults. *Neurology* 54: 180–185.
- Tsujimoto S, Yamamoto S, Kawaguchi H, Koizumi H, Sawaguchi T (2004) Prefrontal cortical activation associated with working memory in adults and preschool children: an event-related optical topography study. *Cereb Cortex* 14: 703–712.
- Schroeter ML, Zysset S, Wahl M, von Cramon DY (2004) Prefrontal activation due to Stroop interference increases during development—an event-related fNIRS study. *Neuroimage* 23: 1317–1325.
- Ramnani N, Owen AM (2004) Anterior prefrontal cortex: insights into function from anatomy and neuroimaging. *Nat Rev Neurosci* 5: 184–194.
- Semendeferi K, Armstrong E, Schleicher A, Zilles K, Van Hoesen GW (2001) Prefrontal cortex in humans and apes: a comparative study of area 10. *Am J Phys Anthropol* 114: 224–241.
- Koechlin E, Basso G, Pietrini P, Panzer S, Grafman J (1999) The role of the anterior prefrontal cortex in human cognition. *Nature* 399: 148–151.
- Fletcher PC, Henson RN (2001) Frontal lobes and human memory: insights from functional neuroimaging. *Brain* 124: 849–881.
- Braver TS, Bongiolatti SR (2002) The role of frontopolar cortex in subgoal processing during working memory. *Neuroimage* 15: 523–536.
- Christoff K, Ream JM, Geddes LP, Gabrieli JD (2003) Evaluating self-generated information: anterior prefrontal contributions to human cognition. *Behav Neurosci* 117: 1161–1168.
- Franceschini MA, Thaker S, Themelis G, Krishnamoorthy KK, Bortfeld H, et al. (2007) Assessment of infant brain development with frequency-domain near-infrared spectroscopy. *Pediatr Res* 61: 546–551.
- Fallgatter AJ, Roesler M, Sitzmann L, Heidrich A, Mueller TJ, et al. (1997) Loss of functional hemispheric asymmetry in Alzheimer's dementia assessed with near-infrared spectroscopy. *Brain Res Cogn Brain Res* 6: 67–72.
- Suto T, Fukuda M, Ito M, Uehara T, Mikuni M (2004) Multichannel near-infrared spectroscopy in depression and schizophrenia: cognitive brain activation study. *Biol Psychiatry* 55: 501–511.
- Kameyama M, Fukuda M, Yamagishi Y, Sato T, Uehara T, et al. (2006) Frontal lobe function in bipolar disorder: a multichannel near-infrared spectroscopy study. *Neuroimage* 29: 172–184.
- Kuwabara H, Kasai K, Takizawa R, Kawakubo Y, Yamasue H, et al. (2006) Decreased prefrontal activation during letter fluency task in adults with pervasive developmental disorders: a near-infrared spectroscopy study. *Behav Brain Res* 172: 272–277.
- Boecker M, Buecheler MM, Schroeter ML, Gauggel S (2007) Prefrontal brain activation during stop-signal response inhibition: an event-related functional near-infrared spectroscopy study. *Behav Brain Res* 176: 259–266.
- Takizawa R, Kasai K, Kawakubo Y, Marumo K, Kawasaki S, et al. (2008) Reduced frontopolar activation during verbal fluency task in schizophrenia: a multi-channel near-infrared spectroscopy study. *Schizophr Res* 99: 250–262.
- Kakimoto Y, Nishimura Y, Hara N, Okada M, Tani H, et al. (2009) Intrasubject reproducibility of prefrontal cortex activities during a verbal fluency task over two repeated sessions using multi-channel near-infrared spectroscopy. *Psychiatry Clin Neurosci* 63: 491–499.
- Kono T, Matsuo K, Tsunashima K, Kasai K, Takizawa R, et al. (2007) Multiple-time replicability of near-infrared spectroscopy recording during prefrontal activation task in healthy men. *Neurosci Res* 57: 504–512.
- Hock C, Villringer K, Muller-Spahn F, Wenzel R, Hecker H, et al. (1997) Decrease in parietal cerebral hemoglobin oxygenation during performance of a verbal fluency task in patients with Alzheimer's disease monitored by means of near-infrared spectroscopy (NIRS)—correlation with simultaneous rCBF-PET measurements. *Brain Res* 755: 293–303.
- Kleinschmidt A, Obrig H, Requardt M, Merboldt KD, Dirnagl U, et al. (1996) Simultaneous recording of cerebral blood oxygenation changes during human brain activation by magnetic resonance imaging and near-infrared spectroscopy. *J Cereb Blood Flow Metab* 16: 817–826.
- Strangman G, Culver JP, Thompson JH, Boas DA (2002) A quantitative comparison of simultaneous BOLD fMRI and NIRS recordings during functional brain activation. *Neuroimage* 17: 719–731.
- Toronov V, Webb A, Choi JH, Wolf M, Michalos A, et al. (2001) Investigation of human brain hemodynamics by simultaneous near-infrared spectroscopy and functional magnetic resonance imaging. *Med Phys* 28: 521–527.
- Mehagnoul-Schipper DJ, van der Kallen BF, Colier WN, van der Sluijs MC, van Erning IJ, et al. (2002) Simultaneous measurements of cerebral oxygenation changes during brain activation by near-infrared spectroscopy and functional magnetic resonance imaging in healthy young and elderly subjects. *Hum Brain Mapp* 16: 14–23.
- Shinba T, Nagano M, Kariya N, Ogawa K, Shinozaki T, et al. (2004) Near-infrared spectroscopy analysis of frontal lobe dysfunction in schizophrenia. *Biol Psychiatry* 55: 154–164.
- Oldfield RC (1971) The assessment and analysis of handedness: the Edinburgh inventory. *Neuropsychologia* 9: 97–113.
- Tsuzuki D, Jurcak V, Singh AK, Okamoto M, Watanabe E, et al. (2007) Virtual spatial registration of stand-alone fNIRS data to MNI space. *Neuroimage* 34: 1506–1518.
- Okamoto M, Dan H, Sakamoto K, Takeo K, Shimizu K, et al. (2004) Three-dimensional probabilistic anatomical cranio-cerebral correlation via the international 10–20 system oriented for transcranial functional brain mapping. *Neuroimage* 21: 99–111.
- Indefrey P, Levelt WJ (2004) The spatial and temporal signatures of word production components. *Cognition* 92: 101–144.
- O'Donnell S, Noseworthy MD, Levine B, Dennis M (2005) Cortical thickness of the frontopolar area in typically developing children and adolescents. *Neuroimage* 24: 948–954.
- Herrmann MJ, Walter A, Ehls AC, Fallgatter AJ (2006) Cerebral oxygenation changes in the prefrontal cortex: effects of age and gender. *Neurobiol Aging* 27: 888–894.
- Kameyama M, Fukuda M, Uehara T, Mikuni M (2004) Sex and age dependencies of cerebral blood volume changes during cognitive activation: a multichannel near-infrared spectroscopy study. *Neuroimage* 22: 1715–1721.
- Takahashi T, Shirane R, Sato S, Yoshimoto T (1999) Developmental changes of cerebral blood flow and oxygen metabolism in children. *AJNR Am J Neuroradiol* 20: 917–922.
- Okada E, Delpy DT (2003) Near-infrared light propagation in an adult head model. II. Effect of superficial tissue thickness on the sensitivity of the near-infrared spectroscopy signal. *Appl Opt* 42: 2915–2922.
- Takahashi T, Takikawa Y, Kawagoe R, Shibuya S, Iwano T, et al. (2011) Influence of skin blood flow on near-infrared spectroscopy signals measured on the forehead during a verbal fluency task. *Neuroimage* 57: 991–1002.
